# Supplementary material
Source: PubMed Central journal article supplement (PMC7382947)
Supplement: NIHMS1605161-supplement-Supp-Table_S1.pdf [file NIHMS1605161-supplement-Supp-Table_S1.pdf]

**Table S1.** Stepwise multivariate logistic regression analysis for independent risk factors for thrombosis

| <b>Age</b>                                  | <b><math>\beta</math>-coefficient</b> | <b>OR (95%CI)</b>       | <b>p-value</b> |
|---------------------------------------------|---------------------------------------|-------------------------|----------------|
| <25                                         | 0.006                                 | 1.00 (0.99-1.02)        | 0.85           |
| 25-35                                       | -0.16                                 | 0.85 (0.47-4.53)        | 0.29           |
| >35                                         | 0.12                                  | 1.13(0.61-2.10)         | 0.17           |
| Diagnosis of concomitant autoimmune disease | 0.06                                  | 1.07(0.57-1.98)         | 0.19           |
| <b>Cardiovascular risk factors (Any)</b>    | <b>0.96</b>                           | <b>2.63(1.18-5.83)</b>  | <b>0.01</b>    |
| <i>Hypertension</i>                         | 0.13                                  | 1.15(0.55-2.22)         | 0.18           |
| <i>Diabetes on medication</i>               | 0.07                                  | 1.05(0.58-1.99)         | 0.57           |
| <i>Hyperlipidemia on medication</i>         | 0.005                                 | 1.03(0.91-1.04)         | 0.78           |
| <i>Obesity (BMI &gt; 30)</i>                | 0.18                                  | 1.17(0.65-2.63)         | 0.12           |
| Smoking (ever)                              | 0.21                                  | 1.15(0.55-2.22)         | 0.18           |
| aPL (any)                                   | 0.23                                  | 1.25 (1.78-3.14)        | 0.11           |
| <b>Multiple positivity</b>                  | <b>1.03</b>                           | <b>2.81 (1.48-5.22)</b> | <b>0.003</b>   |
| Type of pregnancy morbidity                 |                                       |                         |                |
| $\geq$ Three (pre)-embryonic loss           | 0.008                                 | 1.01 (0.98-1.32)        | 0.87           |
| Fetal Loss                                  | 0.007                                 | 1.00 (0.97-1.05)        | 0.86           |
| Premature Birth < 34 week                   | 0.006                                 | 1.00 (0.99-1.03)        | 0.91           |
